# Supplementary material for: SCINA: A Semi-Supervised Subtyping Algorithm of Single Cells and Bulk Samples
Source: MDPI journal article supplement (doi:10.3390/genes10070531), 2019-07-12

(a)

Noise 1 and 2

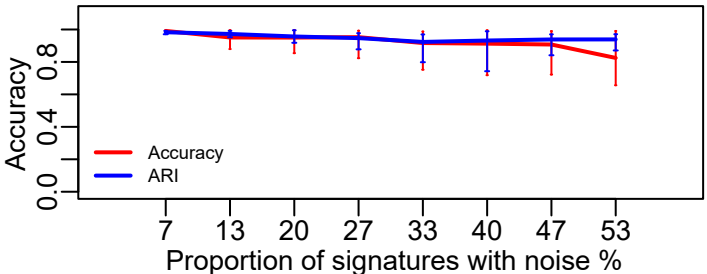

Noise 1 and 3

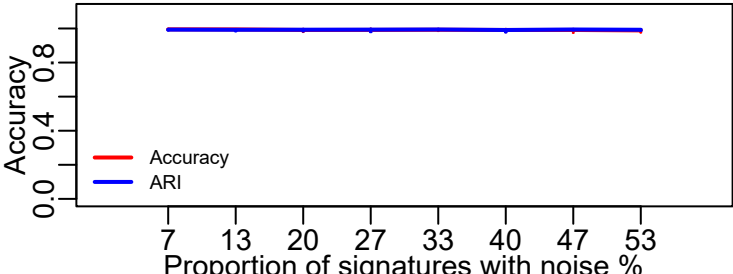

Noise 1 and 4

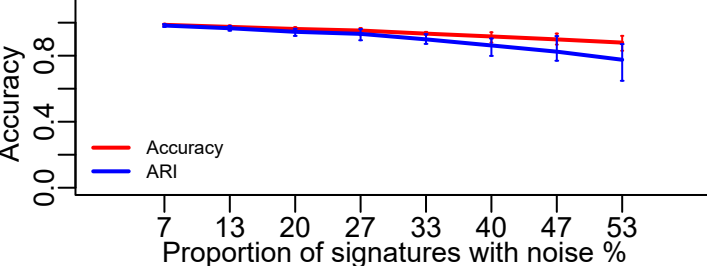

Noise 2 and 3

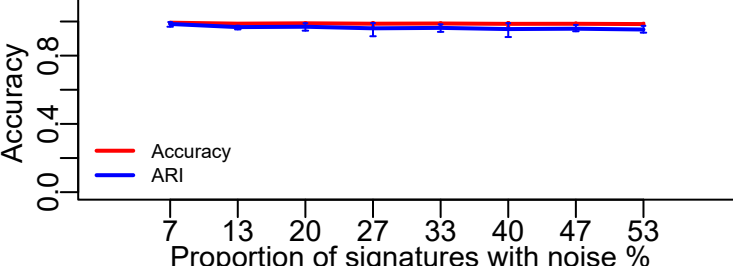

Noise 2 and 4

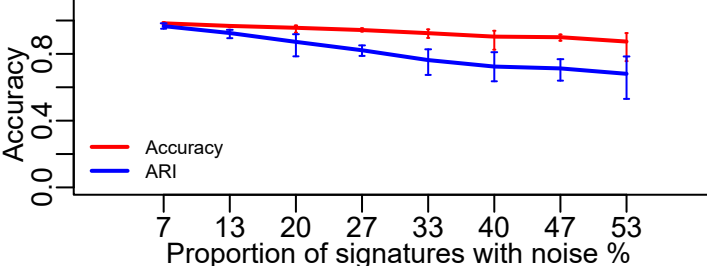

Noise 3 and 4

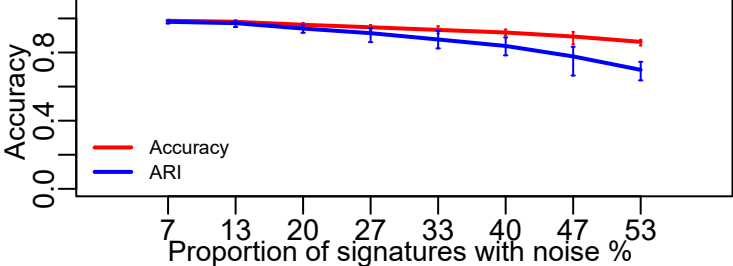

(b)

Noise 1, 2, and 3

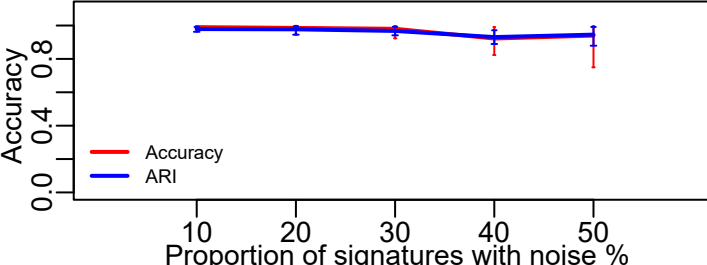

Noise 1, 2, and 4

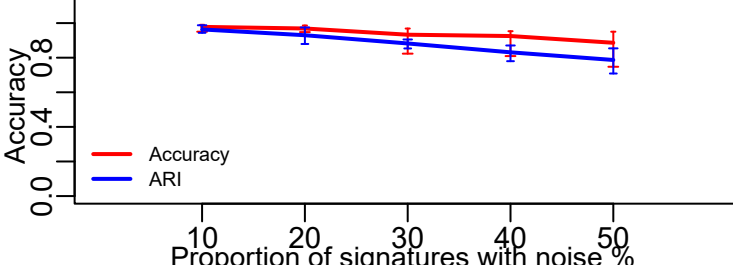

Noise 1, 3, and 4

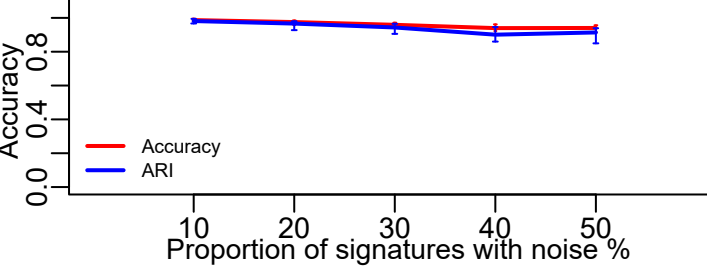

Noise 2, 3, and 4

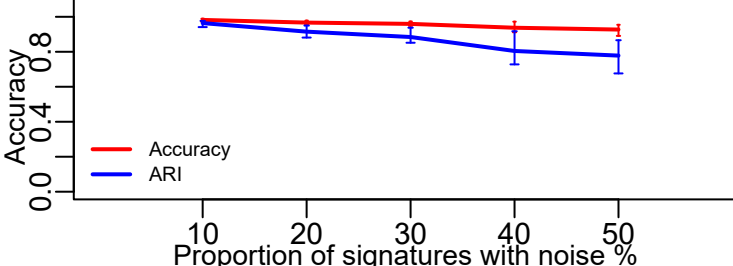

Supplement: s1 [file s1]
