# Supplementary figures and images for: SCINA: A Semi-Supervised Subtyping Algorithm of Single Cells and Bulk Samples
Source: MDPI journal article supplement (doi:10.3390/genes10070531), 2019-07-12

(a)

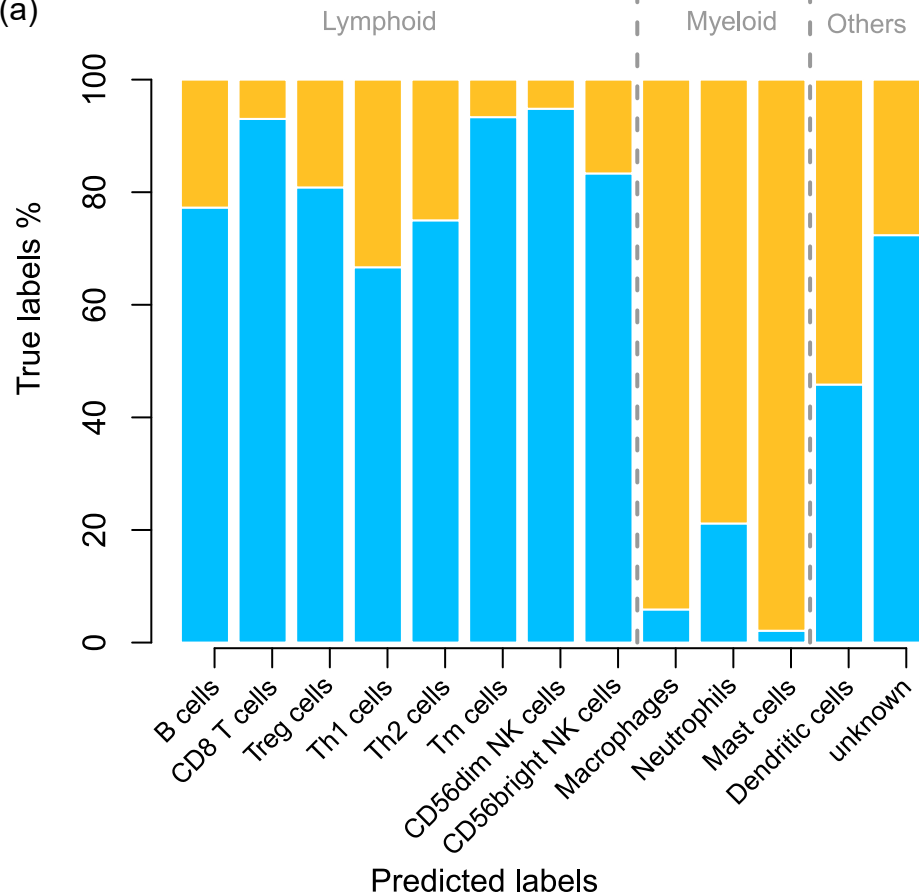

(b)

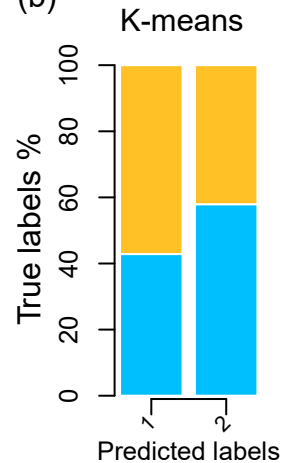

(c)

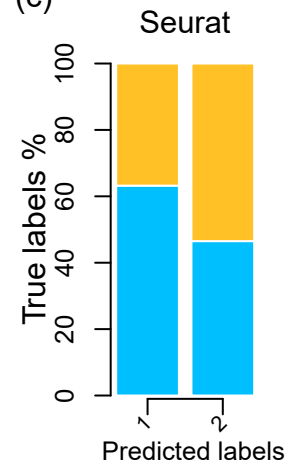

(d)

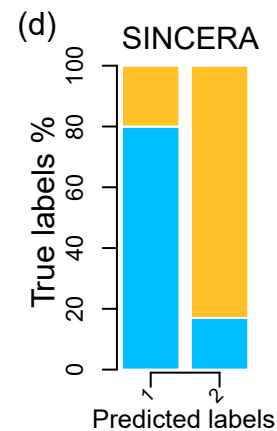

(e)

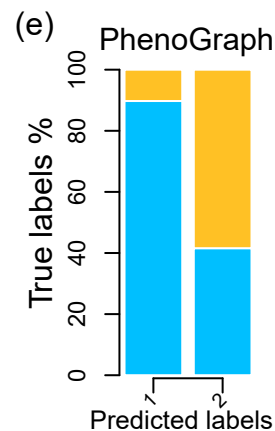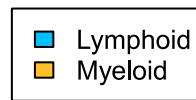

Supplement: s1 [file s1]

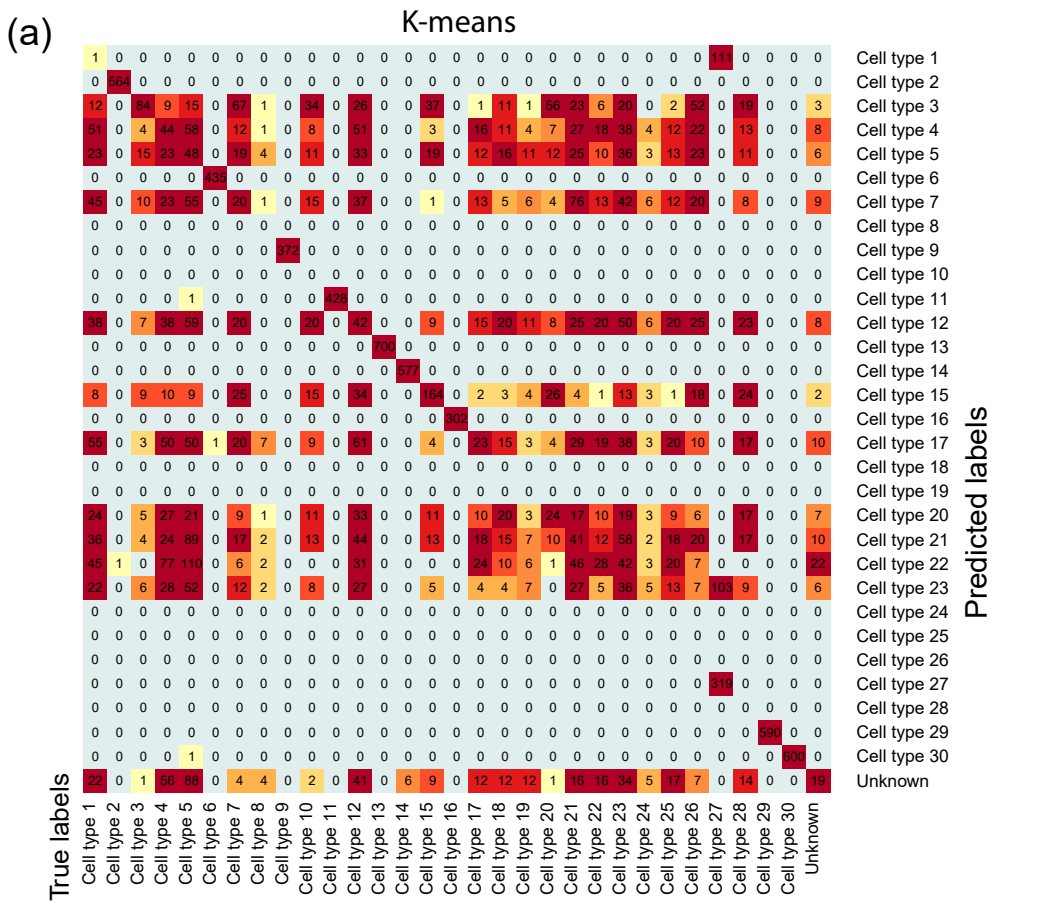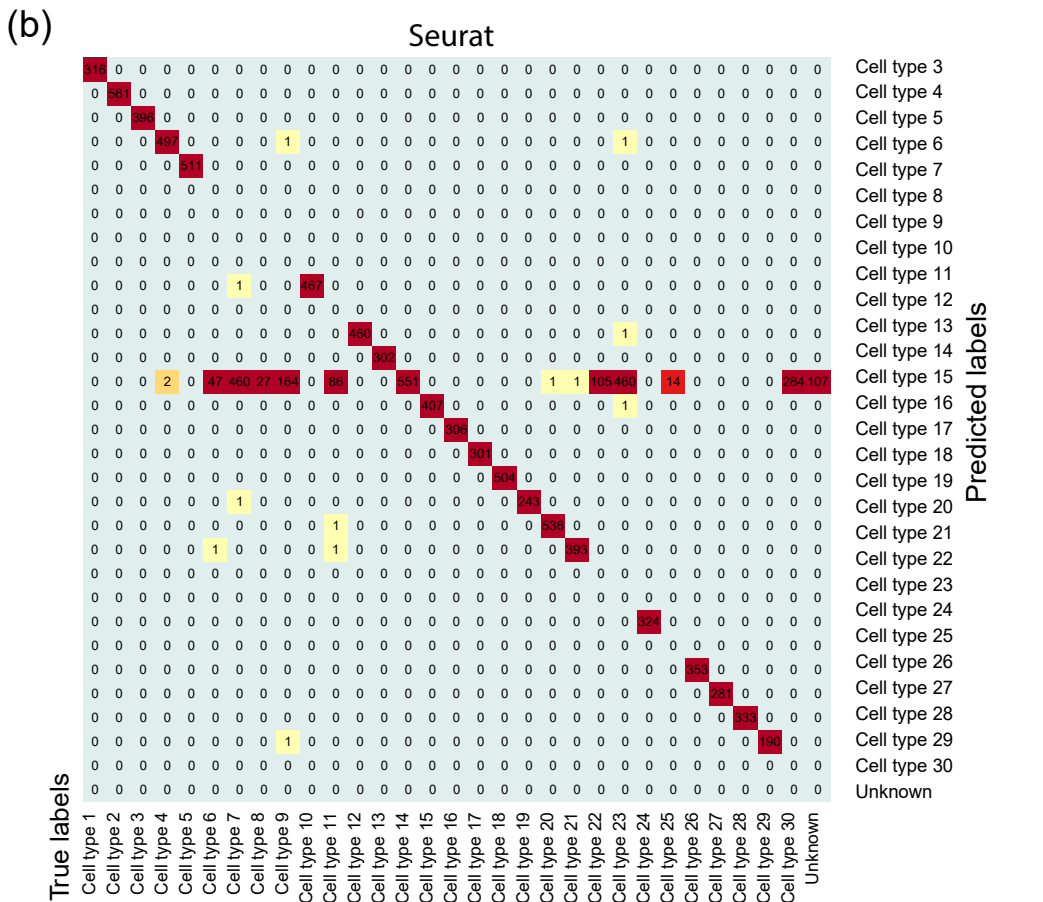

Supplement: s1 [file s1]

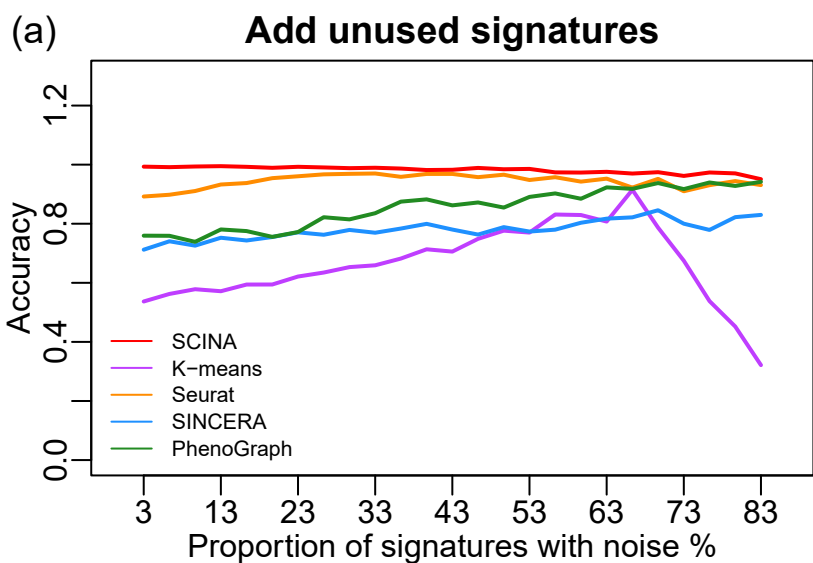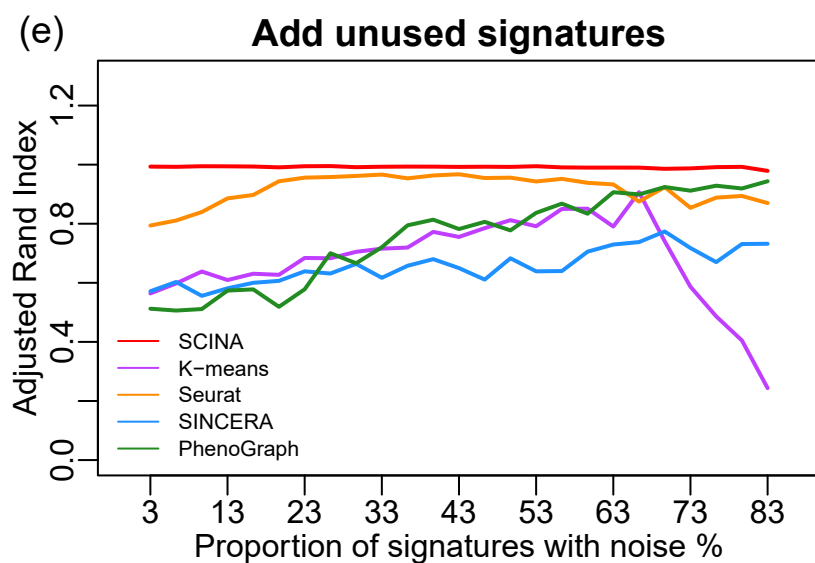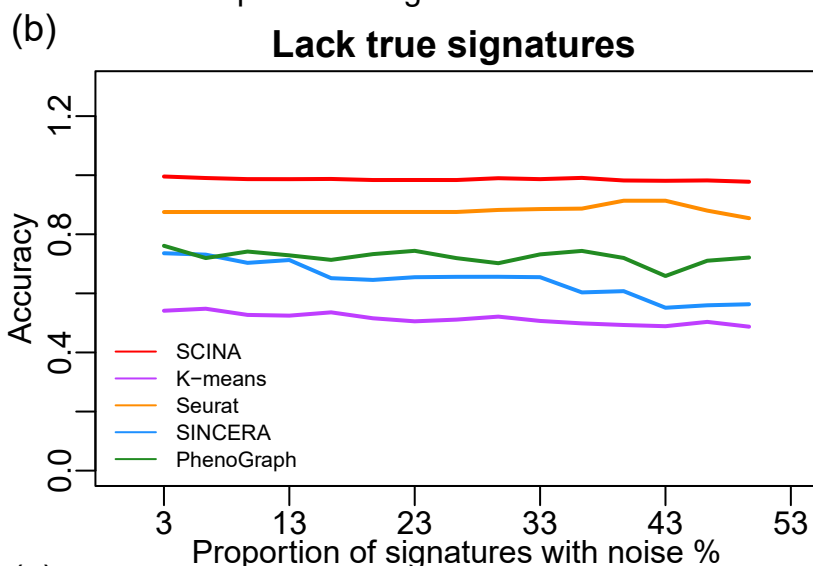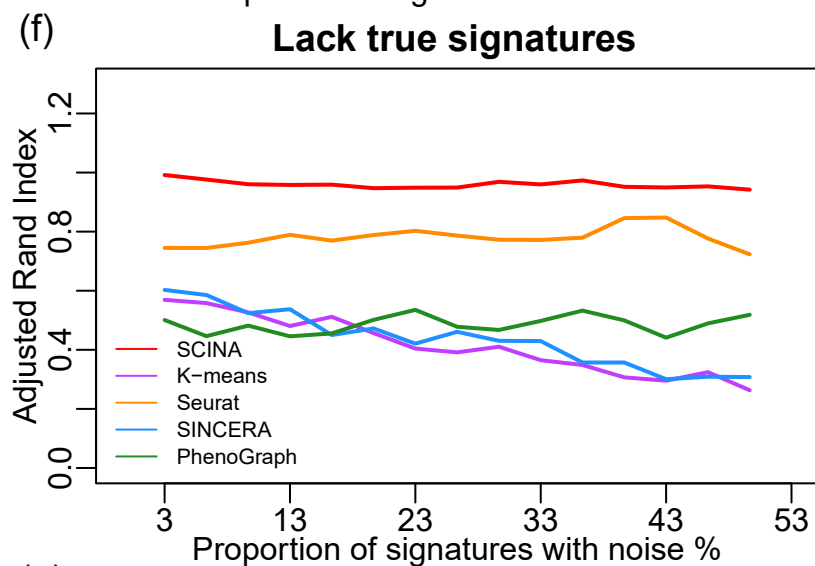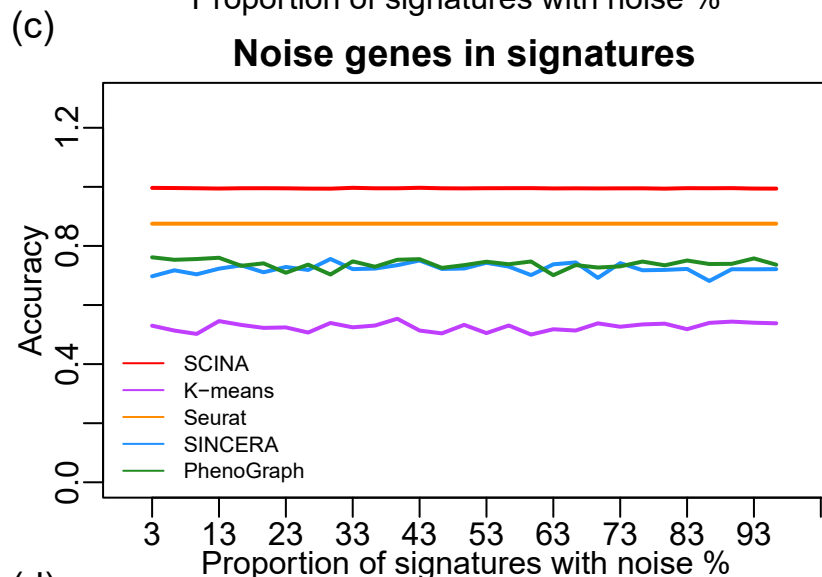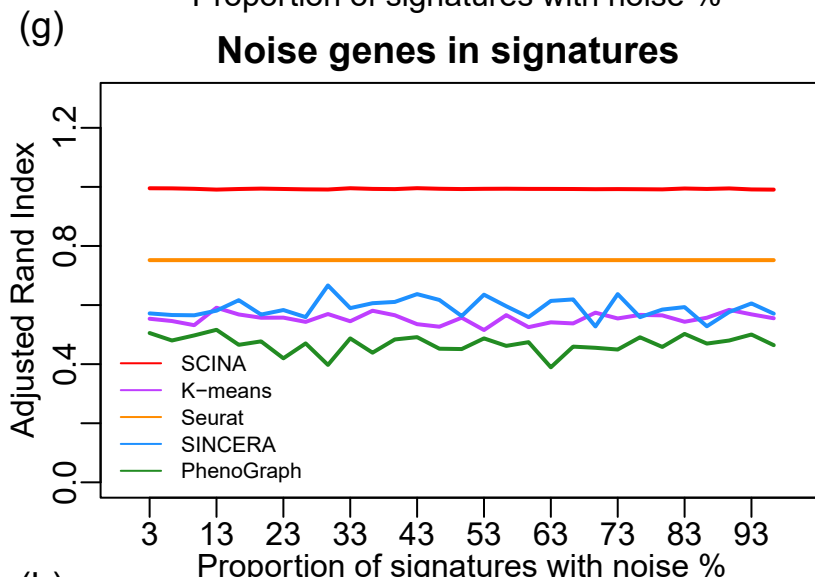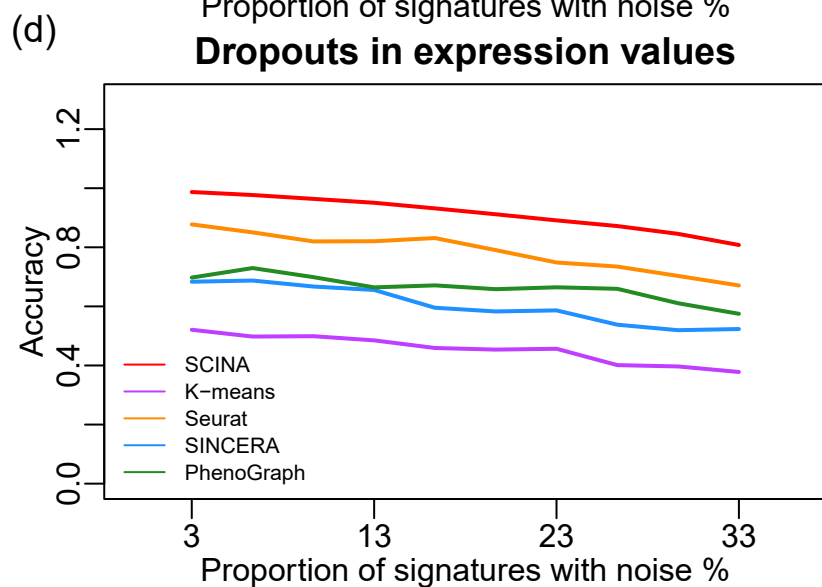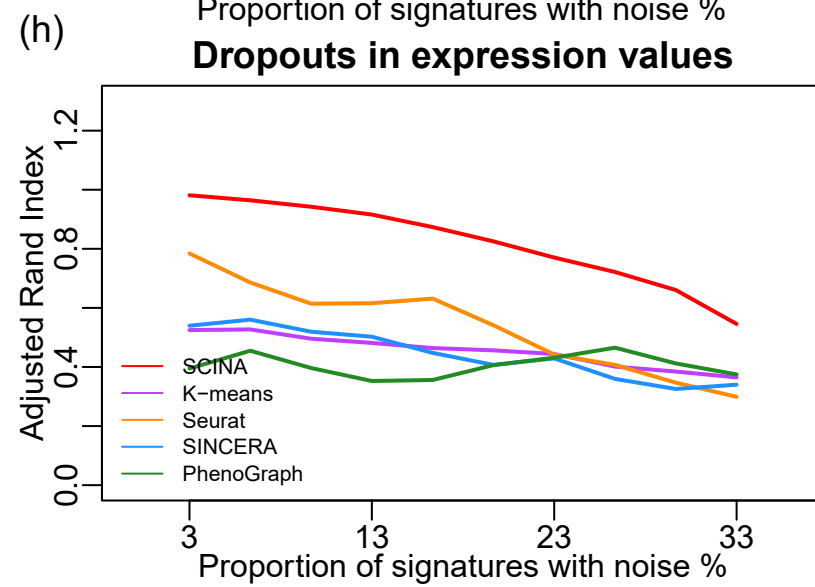

Supplement: s1 [file s1]

(a)

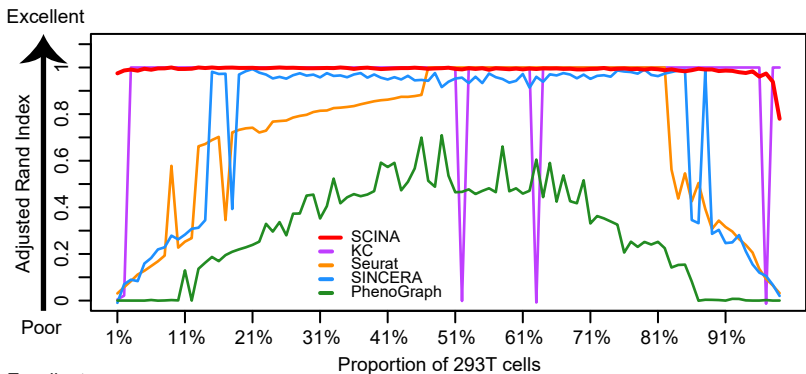

(b)

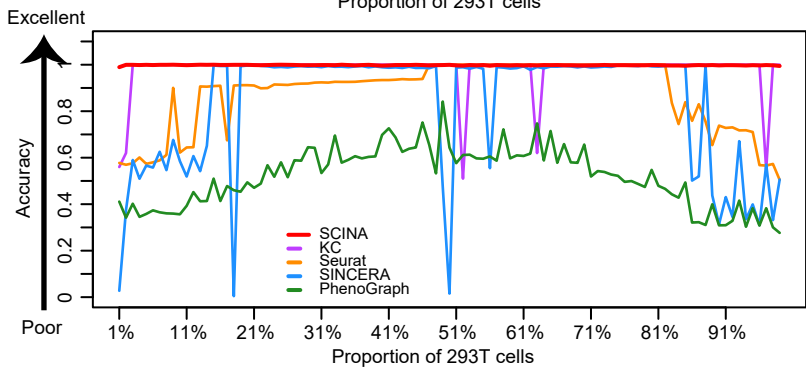

(c)

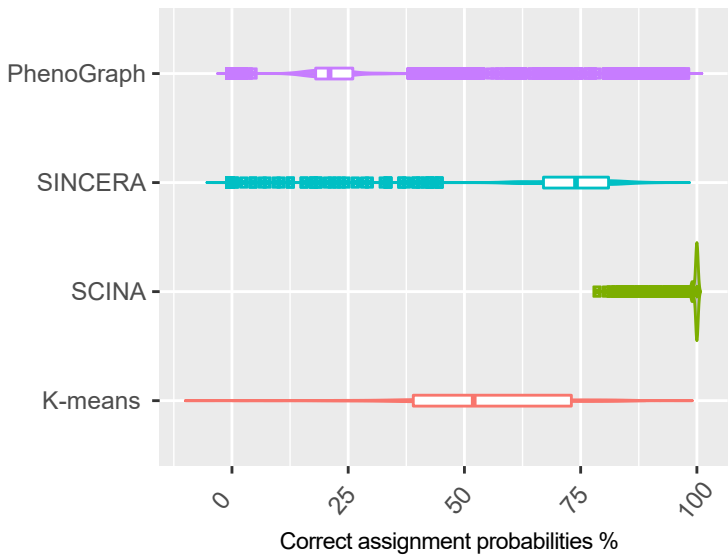

Supplement: s1 [file s1]
